# Supplementary material
Source: Springer Nature journal article supplement (https://www.springermedizin.de/resource/supplementary/13023_2013_692_MOESM15_ESM.pdf/9642682)

**A**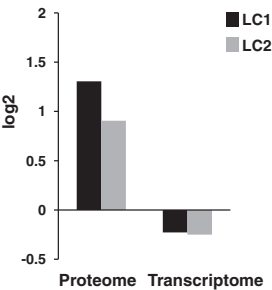**B**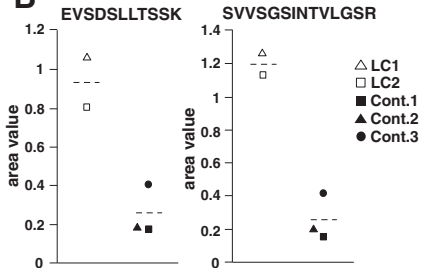**C**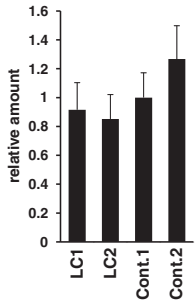**D**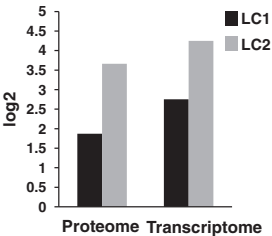**E**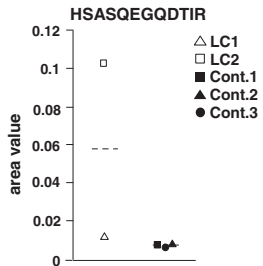**F**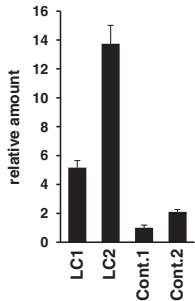

Supplement: MOESM15 [file 9642682]
